# Supplementary material for: Translation and Validation of the German Version of the Ikigai-9
Source: MDPI journal article supplement (doi:10.3390/soc14030039), 2024-03-13
Supplement: s1 [file s1]

Figure S1. Histogram of scores of the subscales

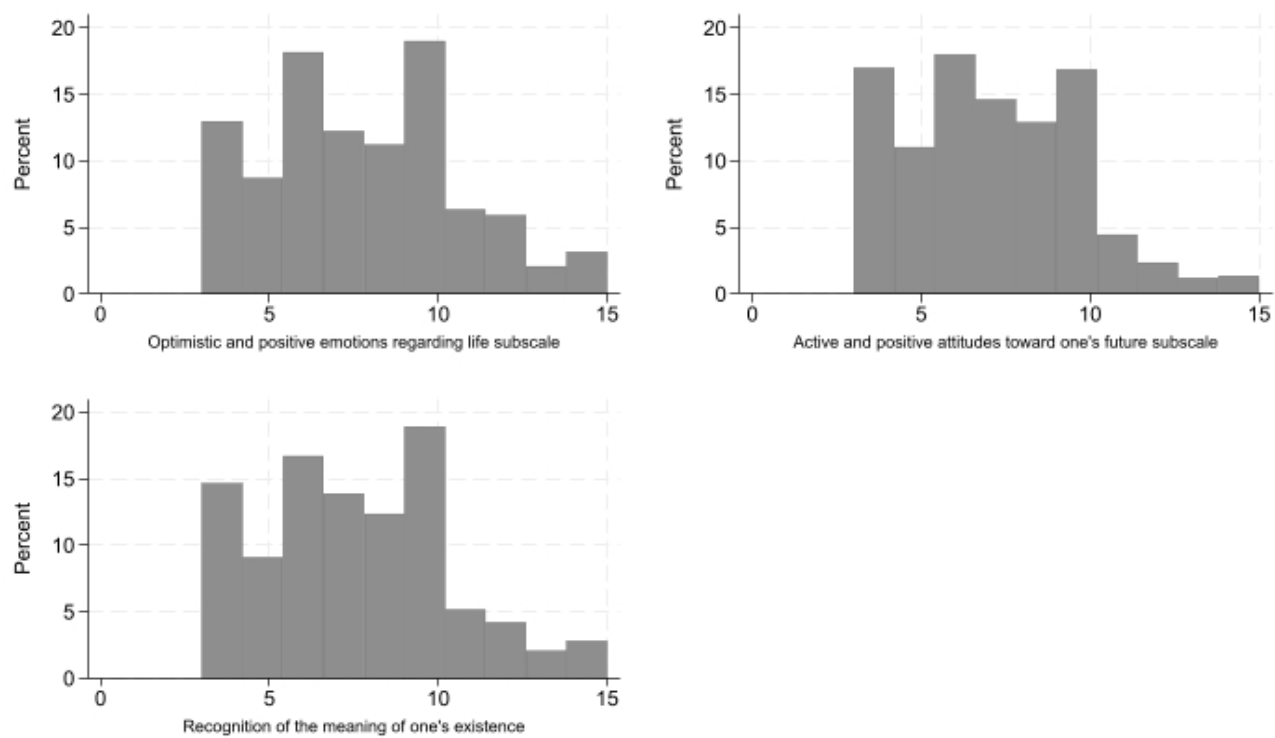

Table S1. Description of items

|        | Missing   | N    | Response categories |        |        |        |       | Alpha  | Loevinger | Number of |
|--------|-----------|------|---------------------|--------|--------|--------|-------|--------|-----------|-----------|
|        | data rate |      | 1                   | 2      | 3      | 4      | 5     | - item | Hj coeff  | NS Hjk    |
| -----  |           |      |                     |        |        |        |       |        |           |           |
| Item 1 | 0.00%     | 5000 | 16.00%              | 37.44% | 25.88% | 15.78% | 4.90% | 0.75   | 0.67      | 0         |
| Item 4 | 0.00%     | 5000 | 18.22%              | 36.02% | 26.86% | 14.74% | 4.16% | 0.83   | 0.62      | 0         |
| Item 7 | 0.00%     | 5000 | 14.86%              | 36.62% | 27.82% | 14.78% | 5.92% | 0.76   | 0.67      | 0         |
| -----  |           |      |                     |        |        |        |       |        |           |           |
| Item 2 | 0.00%     | 5000 | 16.66%              | 36.16% | 27.50% | 15.76% | 3.92% | 0.65   | 0.58      | 0         |
| Item 5 | 0.00%     | 5000 | 32.40%              | 41.08% | 18.02% | 6.08%  | 2.42% | 0.77   | 0.51      | 0         |
| Item 8 | 0.00%     | 5000 | 20.52%              | 35.88% | 28.32% | 11.88% | 3.40% | 0.60   | 0.61      | 0         |
| -----  |           |      |                     |        |        |        |       |        |           |           |
| Item 3 | 0.00%     | 5000 | 17.08%              | 34.62% | 27.56% | 15.28% | 5.46% | 0.73   | 0.53      | 0         |
| Item 6 | 0.00%     | 5000 | 25.16%              | 36.70% | 22.94% | 9.96%  | 5.24% | 0.67   | 0.59      | 0         |
| Item 9 | 0.00%     | 5000 | 17.60%              | 35.38% | 27.28% | 13.66% | 6.08% | 0.68   | 0.56      | 0         |
| -----  |           |      |                     |        |        |        |       |        |           |           |

## Notes:

Column Alpha - item pertains to the Cronbach's alpha coefficients of the scales when the corresponding item is excluded.

Loevinger Hj coeff relates to the item-scale consistency coefficients according to Loevinger.

Number of NS Hjk denotes the count of Hjk coefficients (specifically, Loevinger's coefficients between the given item and each other item within the corresponding dimension) that exhibit no significant deviation from zero.

For more comprehensive insights into interpretability, please see:

Perrot, B., Bataille, E., & Hardouin, J. B. (2018). validscale: A command to validate measurement scales. The Stata Journal, 18(1), 29-50.
